# Supplementary figures and images for: Moving in the Dark—Evidence for an Influence of Artificial Light at Night on the Movement Behaviour of European Hedgehogs (Erinaceus europaeus)
Source: MDPI journal article supplement (doi:10.3390/ani10081306), 2020-07-30

**A**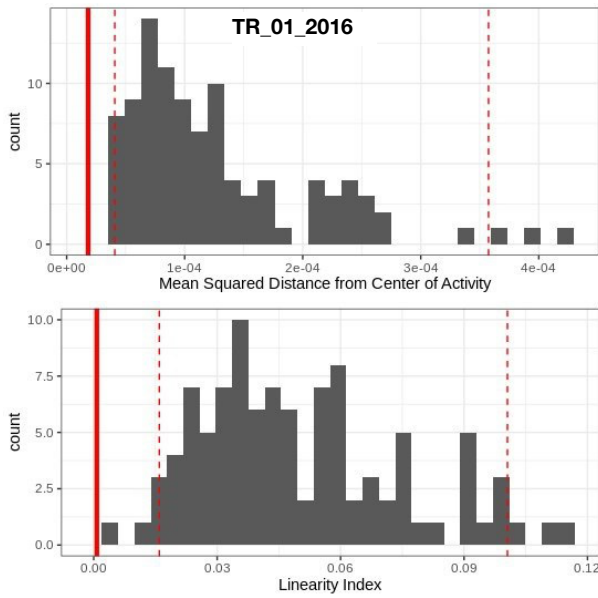**B**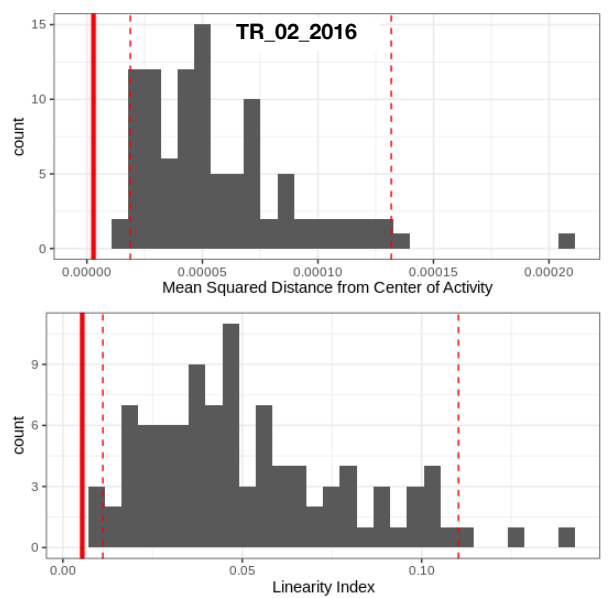**C**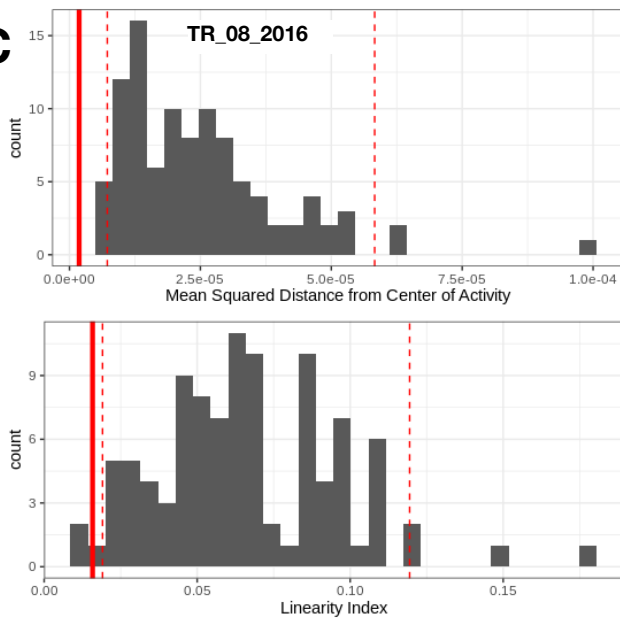**D**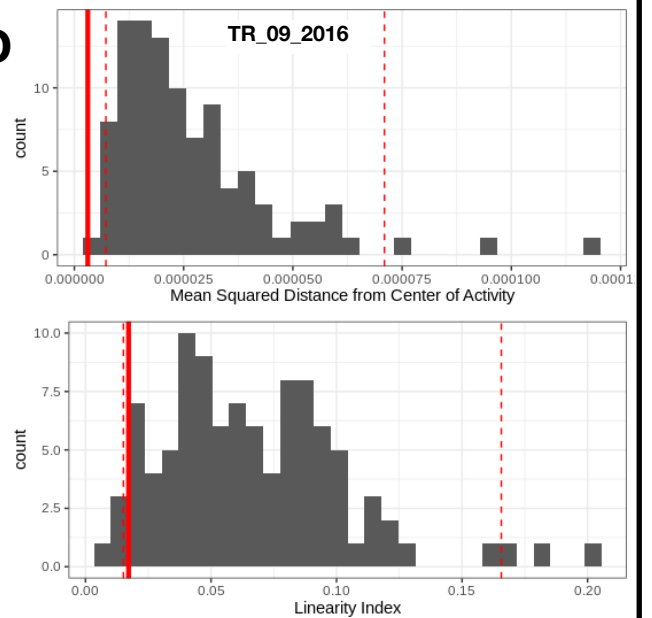**E**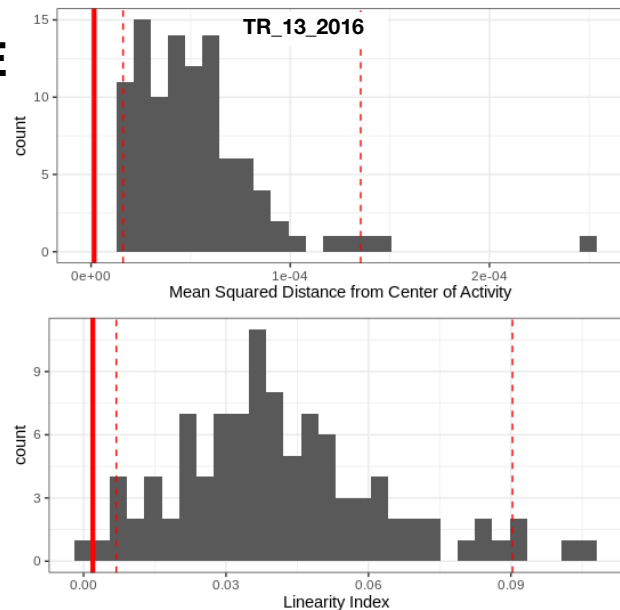**F**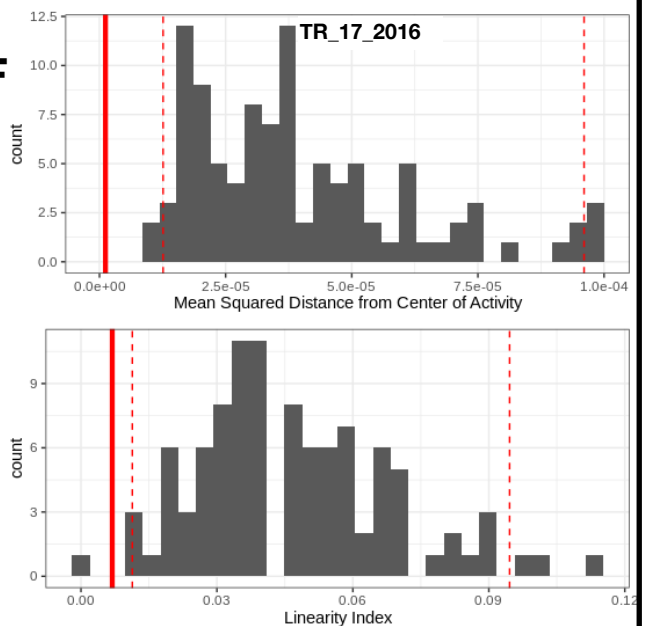

Supplement: s1 [file s1]

**A**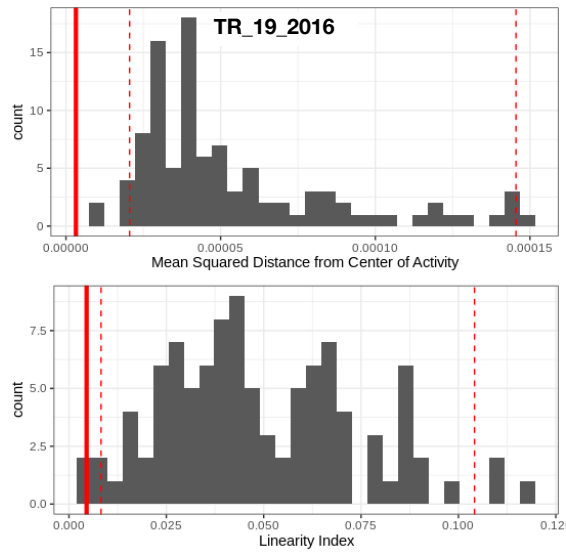**B**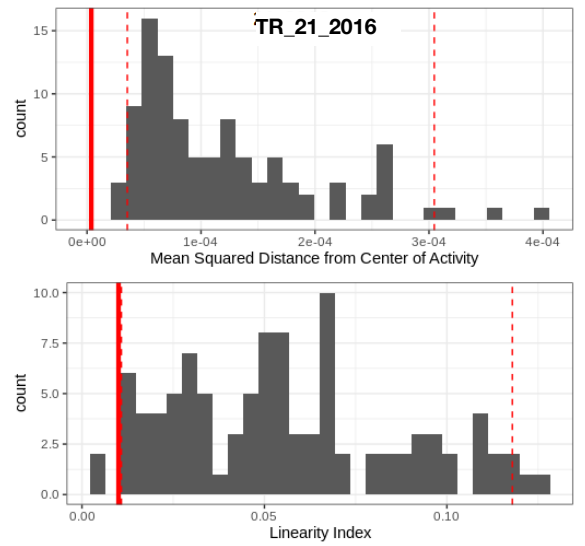**C**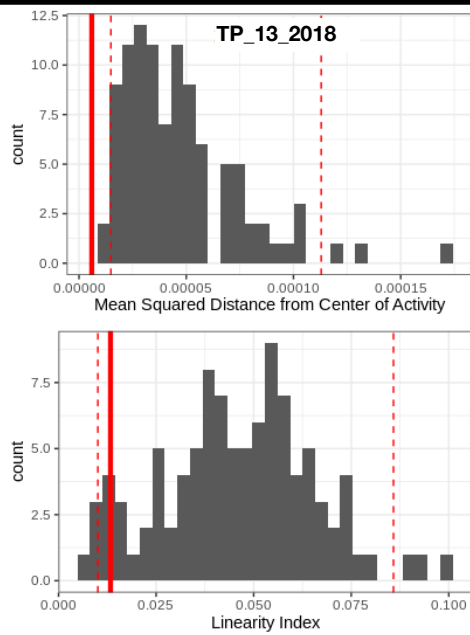**D**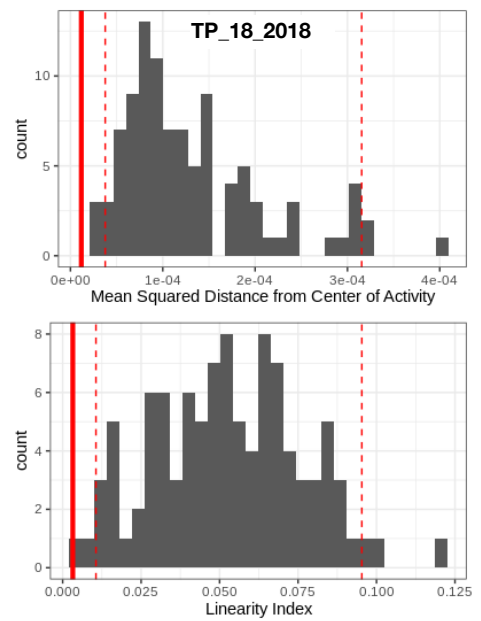**E**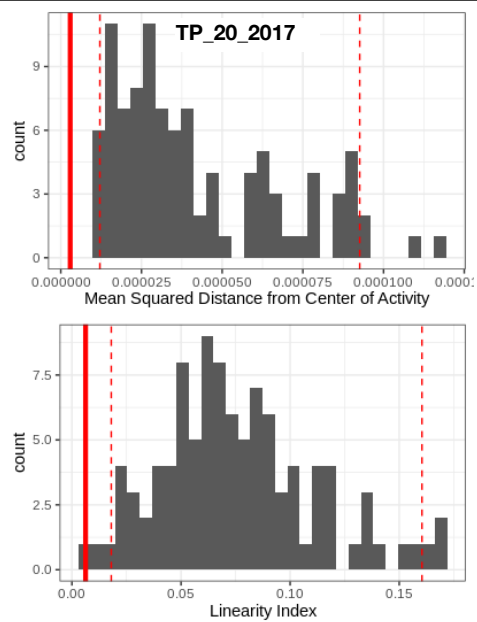**F**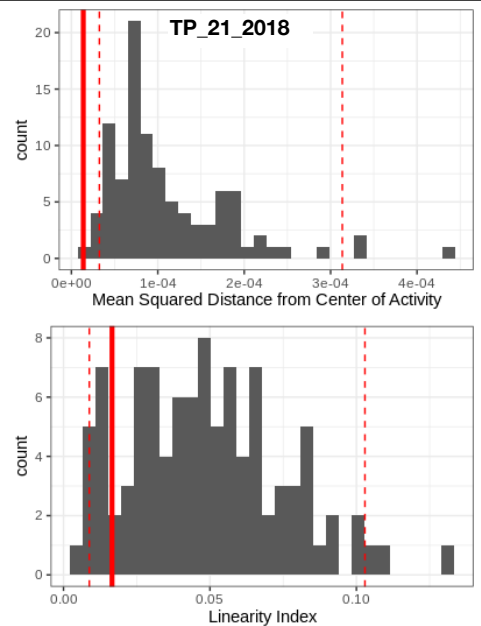

Supplement: s1 [file s1]

**A**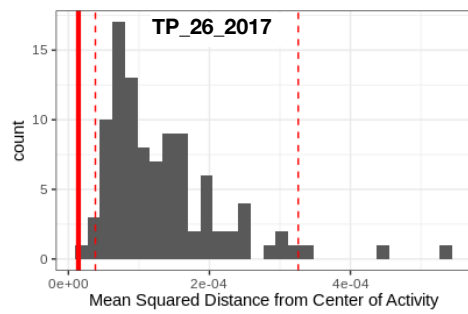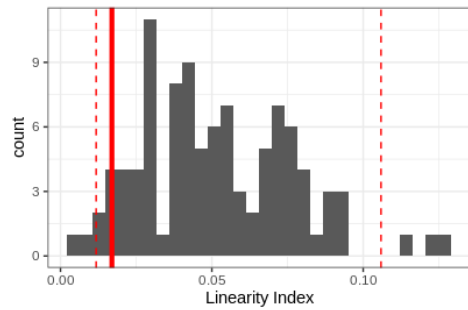**B**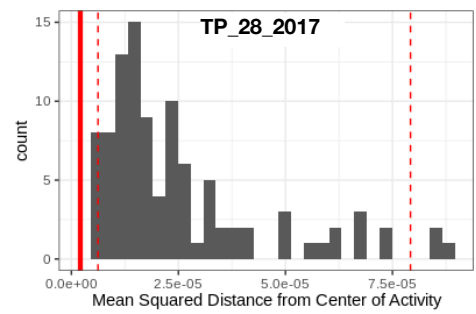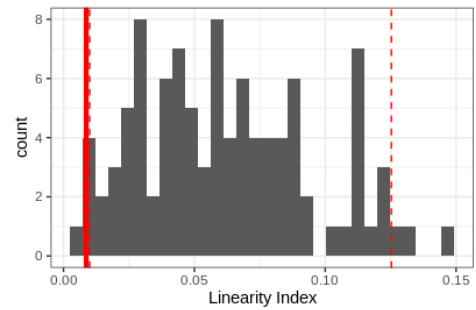**C**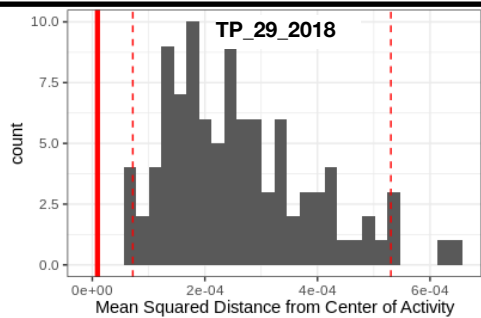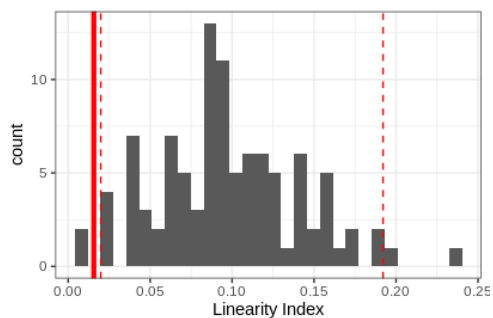**D**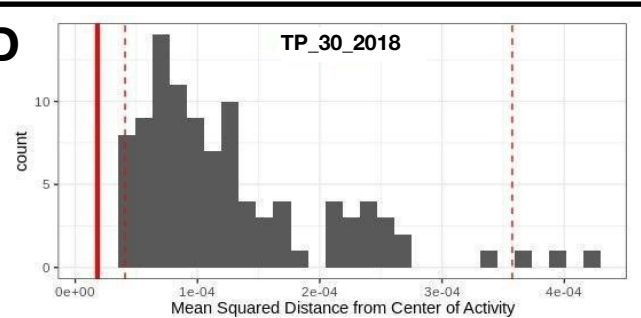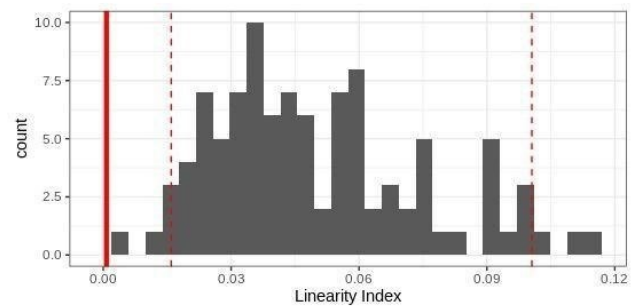**E**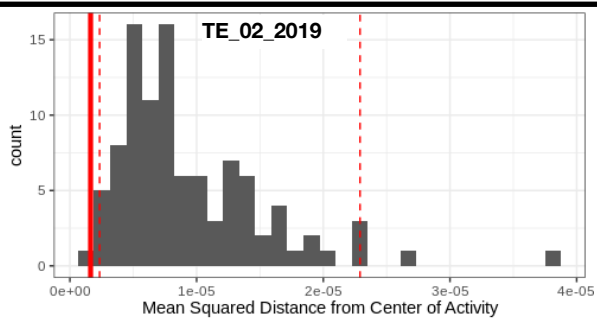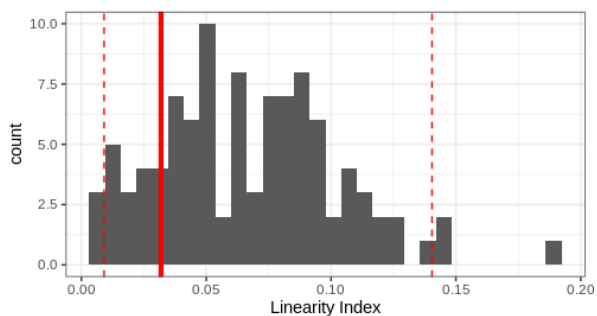**F**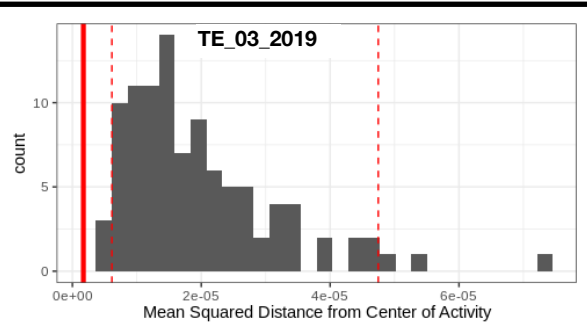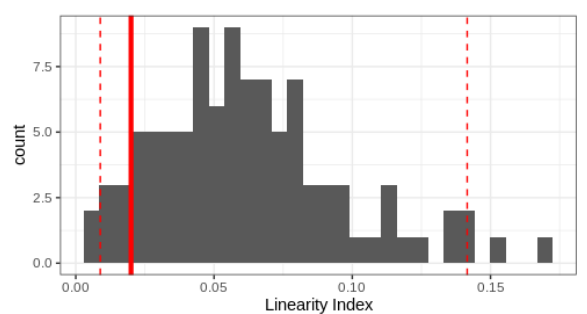

Supplement: s1 [file s1]

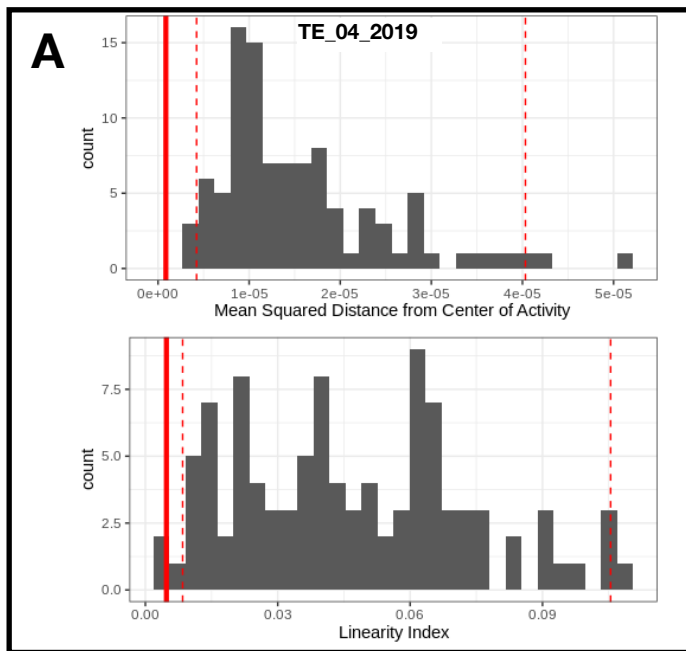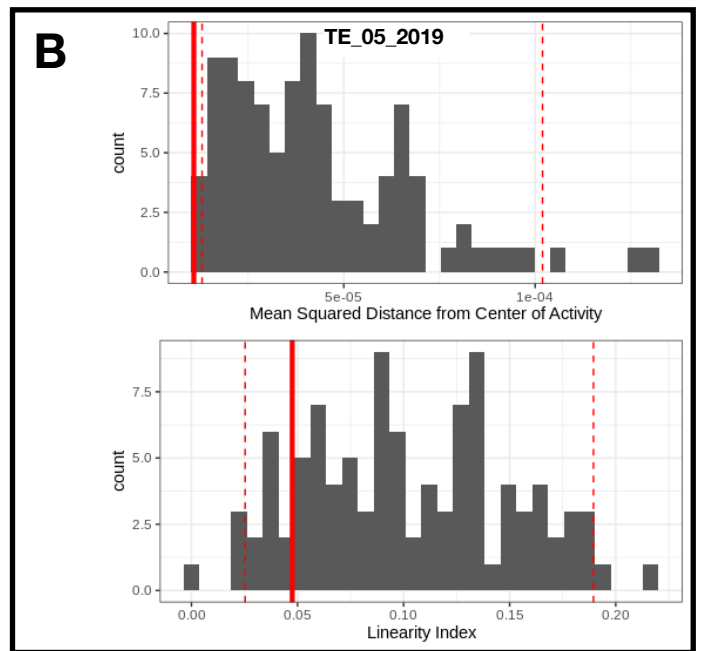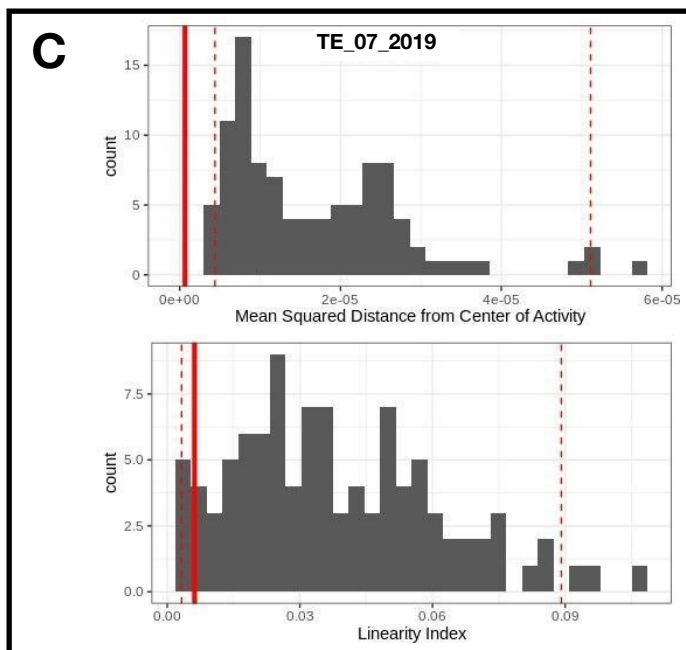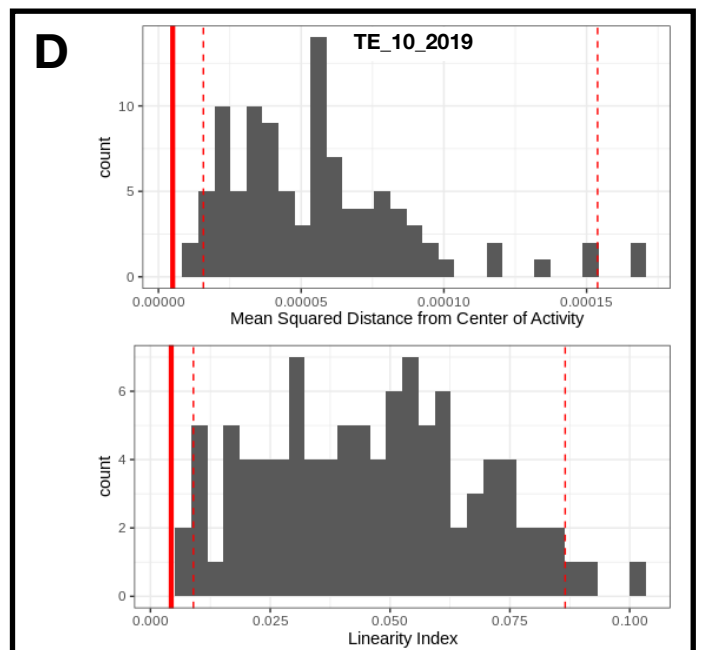

Supplement: s1 [file s1]
